# Supplementary material
Source: publisher site journal article supplement (https://www.dovepress.com/article/411424)
Supplement: Supplementary file 1 [file get_supplementary_file.php]

Supplementary File 1

**Differences in the cell type-specific toxicity of diamond nanoparticles to endothelial cells depending on the exposure of the cell to the nanoparticle**

Mateusz Wierzbicki*1, Katarzyna Zawadzka1, Barbara Wójcik1, Sławomir Jaworski1, Barbara Strojny1, Agnieszka Ostrowska1, Artur Małolepszy2, Marta Mazurkiewicz-Pawlicka2, Ewa Sawosz1

1 Department of Nanobiotechnology, Institute of Biology, Warsaw University of Life Sciences, Ciszewskiego 8, 02-786 Warsaw, Poland;

2 Faculty of Chemical and Process Engineering, Warsaw University of Technology, 00-654 Warsaw, Poland;

* Correspondence: [mateusz_wierzbicki@sggw.edu.pl](mailto:mateusz_wierzbicki@sggw.edu.pl)


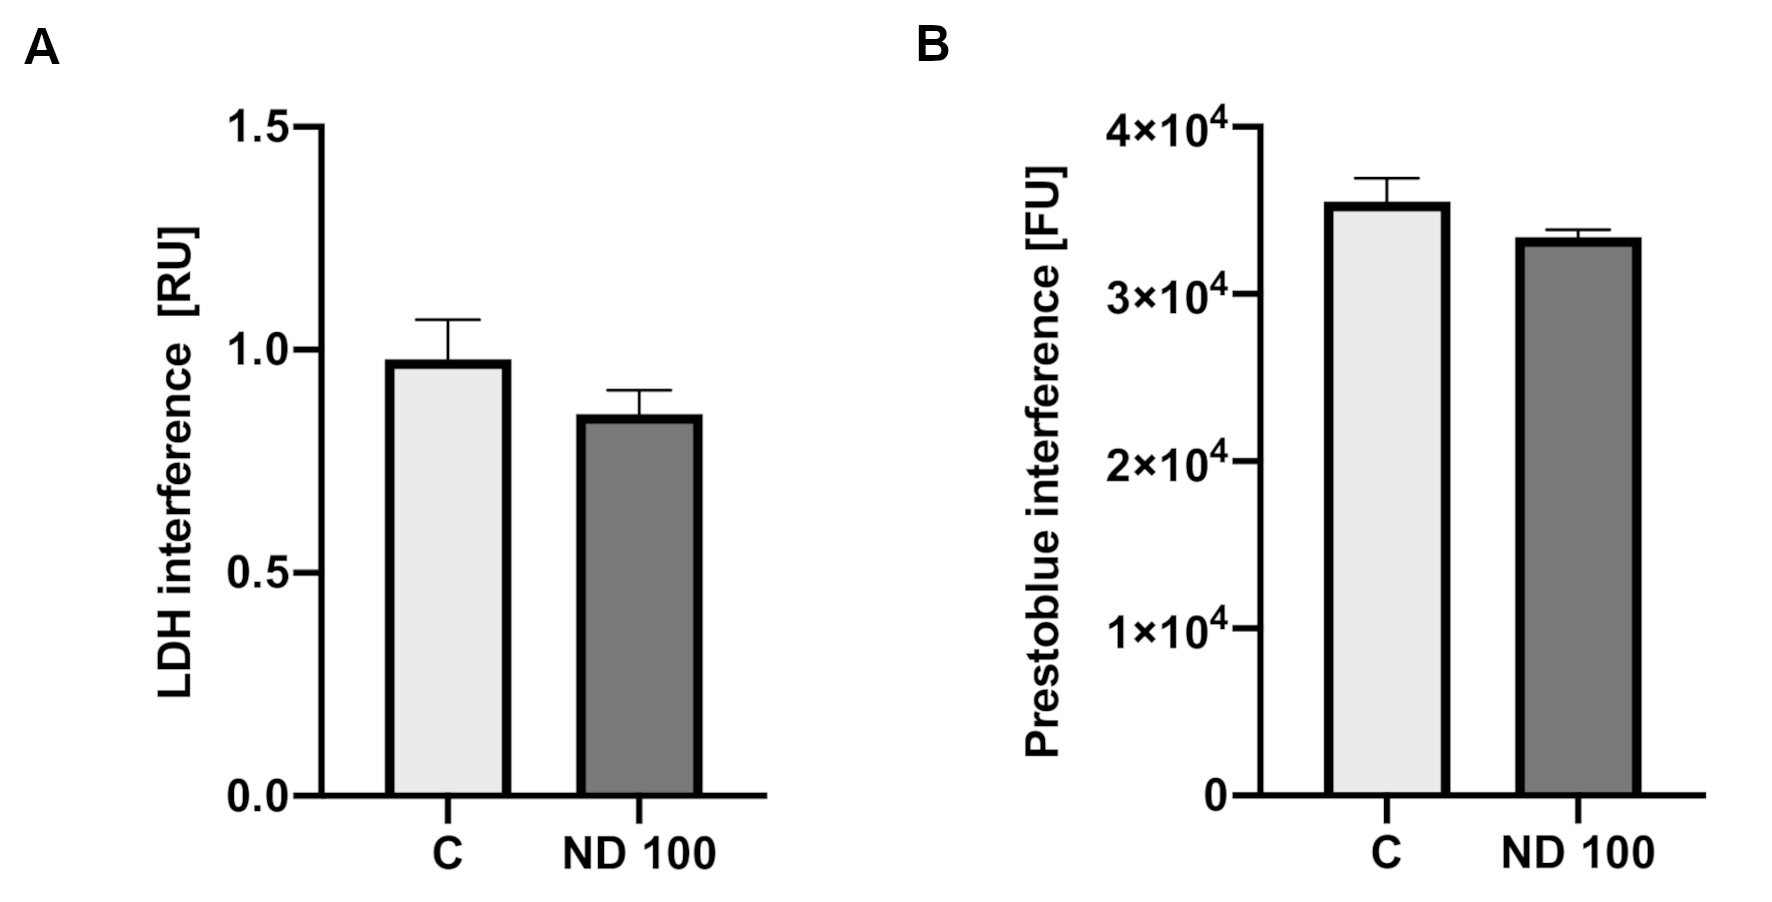


**Figure 1S Interference analysis of LDH and Prestoblue assays.** Analysis of the interference was performed in exactly the same way as the actual analysis but without the presence of cells using ND at a concentration of 100 mg/l. Analysis showed no statistical significance at P<0.05 for LDH assay (P= 0.0566) (A) and Prestoblue assay (P = 0,0679 (B) (n=3, with four individual replicates).


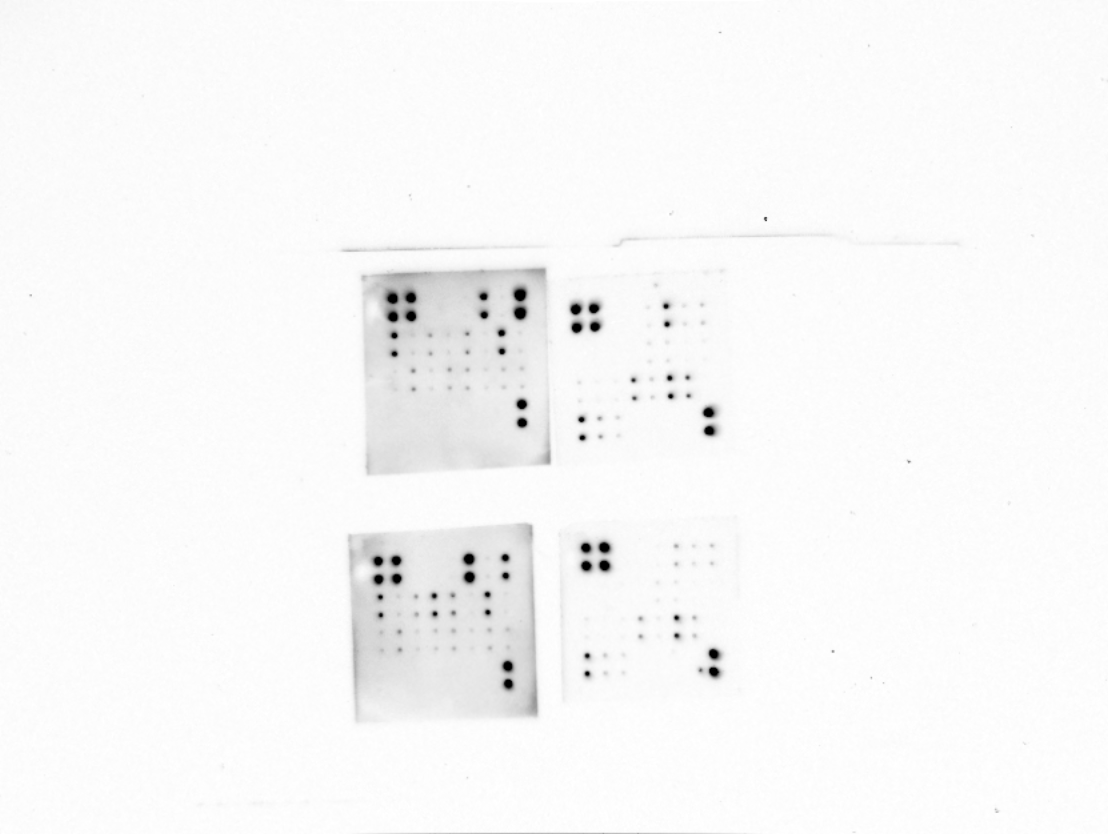


**Figure 2S Raw image of membranes after visualization**. Left membranes show analysis of control HUVEC extract. Right membranes show analysis of HUVEC extracts that were incubated with ND at a concentration of 20 mg/l for 24 h.

**Table S1. Array map of the membrane I**

|  | A | B | C | D | E | F | G | H |
| --- | --- | --- | --- | --- | --- | --- | --- | --- |
| 1 | POS | POS | NEG | NEG | ANG | EGF | ENA-78 | bFGF |
| 2 | POS | POS | NEG | NEG | ANG | EGF | ENA-78 | bFGF |
| 3 | GRO A | IFN-γ | IGF-1 | IL-6 | IL-8 | Leptin | MCP-1 | PDGF-BB |
| 4 | GRO A | IFN-γ | IGF-1 | IL-6 | IL-8 | Leptin | MCP-1 | PDGF-BB |
| 5 | PLGF | CCL5 | TGF β1 | TIMP-1 | TIMP-2 | THPO | VEGF | VEGF-D |
| 6 | PLGF | CCL5 | TGF β1 | TIMP-1 | TIMP-2 | THPO | VEGF | VEGF-D |
| 7 | blank | blank | blank | blank | blank | blank | NEG | POS |
| 8 | blank | blank | blank | blank | blank | blank | NEG | POS |

Abbreviations: POS, positive control; NEG, negative control; ANG, angiogenin; EGF, epidermal growth factor; ENA-78, CXCL5; bFGF, basic fibroblast growth factor; GRO A, growth regulated oncogene-alpha; IFN-γ, interferon gamma; IGF-1, insulin-like growth factor 1; IL-6, interleukin 6; IL-8, interleukin 8; MCP-1, monocyte chemoattractant protein-1; PDGF-BB, platelet-derived growth factor-BB; PLGF, placenta growth factor; TGF b1, transforming growth factor β1; TIMP-1, tissue inhibitor of metalloproteinases 1; TIMP-2, tissue inhibitor of metalloproteinases 2; THPO, thrombopoietin; VEGF, vascular endothelial growth factor; VEGF D, vascular endothelial growth factor D.

**Table S2. Array map of the membrane II**

|  | A | B | C | D | E | F | G | H |
| --- | --- | --- | --- | --- | --- | --- | --- | --- |
| 1 | POS | POS | NEG | NEG | ANGPT1 | ANGPT2 | PLG | Endostatin |
| 2 | POS | POS | NEG | NEG | ANGPT1 | ANGPT2 | PLG | Endostatin |
| 3 | G-CSF | GM-CSF | I-309 | IL-10 | IL-1 a | IL-1 b | IL-2 | IL-4 |
| 4 | G-CSF | GM-CSF | I-309 | IL-10 | IL-1 a | IL-1 b | IL-2 | IL-4 |
| 5 | CXCL11 | MCP-3 | MCP-4 | MMP-1 | MMP-9 | PECAM-1 | TIE-2 | TNF a |
| 6 | CXCL11 | MCP-3 | MCP-4 | MMP-1 | MMP-9 | PECAM-1 | TIE-2 | TNF a |
| 7 | uPAR | VEGFR2 | VEGFR3 | blank | blank | blank | NEG | POS |
| 8 | uPAR | VEGFR2 | VEGFR3 | blank | blank | blank | NEG | POS |

Abbreviations: POS, positive control; NEG, negative control; ANGPT1, Angiopoietin 1; ANGPT2, Angiopoietin 2; PLG, Plasminogen; G-CSF, granulocyte-colony stimulating factor; I-309, CCL1; IL-10, interleukin 10 ; IL-1 a, interleukin 1 alpha; IL-1 b, interleukin 1 beta; IL-2, interleukin 2; IL-4, interleukin 4; MCP-3, monocyte chemotactic protein-3; MCP-4, monocyte chemotactic protein-4; MMP-1, matrix metalloproteinase-1; MMP-9, matrix metalloproteinase-9; PECAM-1, platelet endothelial cell adhesion molecule 1; TIE-2, Angiopoietin-1 receptor; TNF a, tumor necrosis factor alpha; uPAR, urokinase plasminogen activator surface receptor; VEGFR2, vascular endothelial growth factor receptor 2; VEGFR3, vascular endothelial growth factor receptor 3.
